# Supplementary material for: Neural circuit dynamics of drug-context associative learning in the mouse hippocampus
Source: PubMed Central journal article supplement (PMC9640587; doi:10.1038/s41467-022-34114-x), 2022-11-07
Supplement: 41467_2022_34114_MOESM2_ESM.pdf [file 41467_2022_34114_MOESM2_ESM.pdf]

## **Description of Additional Supplementary Files**

File Name: Supplementary Movie 1

Description: the performance of motion correction on a raw video clip of an example mouse.

File Name: Supplementary Movie 2

Description: the performance of cross-session alignment on the maximum projected images of baseline and test sessions from an example mouse.

File Name: Supplementary Movie 3

Description: an example tracked neurons (white circle) through baseline to test sessions.
