# Supplementary material for: Neural circuit dynamics of drug-context associative learning in the mouse hippocampus
Source: PubMed Central journal article supplement (PMC9640587; doi:10.1038/s41467-022-34114-x), 2022-11-07
Supplement: 41467_2022_34114_MOESM6_ESM.pdf [file 41467_2022_34114_MOESM6_ESM.pdf]

## Reporting Summary

Nature Portfolio wishes to improve the reproducibility of the work that we publish. This form provides structure for consistency and transparency in reporting. For further information on Nature Portfolio policies, see our [Editorial Policies](#) and the [Editorial Policy Checklist](#).

### Statistics

For all statistical analyses, confirm that the following items are present in the figure legend, table legend, main text, or Methods section.

n/a Confirmed

- The exact sample size ( $n$ ) for each experimental group/condition, given as a discrete number and unit of measurement
- A statement on whether measurements were taken from distinct samples or whether the same sample was measured repeatedly
- The statistical test(s) used AND whether they are one- or two-sided  
*Only common tests should be described solely by name; describe more complex techniques in the Methods section.*
- A description of all covariates tested
- A description of any assumptions or corrections, such as tests of normality and adjustment for multiple comparisons
- A full description of the statistical parameters including central tendency (e.g. means) or other basic estimates (e.g. regression coefficient) AND variation (e.g. standard deviation) or associated estimates of uncertainty (e.g. confidence intervals)
- For null hypothesis testing, the test statistic (e.g.  $F$ ,  $t$ ,  $r$ ) with confidence intervals, effect sizes, degrees of freedom and  $P$  value noted  
*Give  $P$  values as exact values whenever suitable.*
- For Bayesian analysis, information on the choice of priors and Markov chain Monte Carlo settings
- For hierarchical and complex designs, identification of the appropriate level for tests and full reporting of outcomes
- Estimates of effect sizes (e.g. Cohen's  $d$ , Pearson's  $r$ ), indicating how they were calculated

*Our web collection on [statistics for biologists](#) contains articles on many of the points above.*

### Software and code

Policy information about [availability of computer code](#)

**Data collection** Ca++ Imaging data were acquired using custom-developed and validated software (Compiled DAQ Software OLD, [https://github.com/daharoni/Miniscope\\_DAQ\\_Software](https://github.com/daharoni/Miniscope_DAQ_Software))

**Data analysis** Ca++ imaging data were preprocessed and analyzed using MATLAB based packages and scripts. MATLAB packages that were used for the manuscript include NoRMCorre v1.0.0 (<https://github.com/flatironinstitute/NoRMCorre>) for image motion correction, image-registration ([github.com/fordanic/image-registration](https://github.com/fordanic/image-registration)) for image alignment across days, CNMF-E ([https://github.com/zhoup/CNMF\\_E](https://github.com/zhoup/CNMF_E)) for Ca++ signal extraction, and OASIS ([https://github.com/zhoup/OASIS\\_matlab](https://github.com/zhoup/OASIS_matlab)) for Ca++ signal deconvolution. MATLAB 2017b and 2020a was used to perform statistical analyses. Custom MATLAB code generated in this study is available at: [https://github.com/yanjuns/Sun\\_Giocomo\\_2022\\_NComms](https://github.com/yanjuns/Sun_Giocomo_2022_NComms)

For manuscripts utilizing custom algorithms or software that are central to the research but not yet described in published literature, software must be made available to editors and reviewers. We strongly encourage code deposition in a community repository (e.g. GitHub). See the Nature Portfolio [guidelines for submitting code & software](#) for further information.

### Data

Policy information about [availability of data](#)

All manuscripts must include a [data availability statement](#). This statement should provide the following information, where applicable:

- Accession codes, unique identifiers, or web links for publicly available datasets
- A description of any restrictions on data availability
- For clinical datasets or third party data, please ensure that the statement adheres to our [policy](#)

The datasets generated in the current study are available on Mendeley Data: <https://doi.org/10.17632/p8gh7wk9z3.1>

## Field-specific reporting

Please select the one below that is the best fit for your research. If you are not sure, read the appropriate sections before making your selection.

Life sciences       Behavioural & social sciences       Ecological, evolutionary & environmental sciences

For a reference copy of the document with all sections, see [nature.com/documents/nr-reporting-summary-flat.pdf](https://www.nature.com/documents/nr-reporting-summary-flat.pdf)

## Life sciences study design

All studies must disclose on these points even when the disclosure is negative.

|                 |                                                                                                                                                                                                                                                                                                                                                                                                                                                                                                                  |
|-----------------|------------------------------------------------------------------------------------------------------------------------------------------------------------------------------------------------------------------------------------------------------------------------------------------------------------------------------------------------------------------------------------------------------------------------------------------------------------------------------------------------------------------|
| Sample size     | Depending on the analysis in question, sample size was determined by the number of mice or number of recording sessions. Sample size and the type of data used to determine it are reported appropriately in the manuscript. The sample sizes were not calculated by power analyses; however, our sample sizes are comparable or higher than those previously used in the literature and our results are consistent across animals (Sjulson et al., 2018, Xia et al., 2017, Trouche et al., 2016).               |
| Data exclusions | Prior to the CPP experiments, we defined an exclusion threshold, in which we would exclude any mouse that spent more than 75% of their total time in one compartment in the baseline session; however, no mice reached this threshold thus no mice were excluded.                                                                                                                                                                                                                                                |
| Replication     | Up to six mice were used as a cohort for each batch of experiments. Key experiments (Ctrl, MA, MO) were repeated with at least two different cohorts of mice and the results are reproducible.                                                                                                                                                                                                                                                                                                                   |
| Randomization   | Animals were randomly assigned to experimental groups.                                                                                                                                                                                                                                                                                                                                                                                                                                                           |
| Blinding        | Experimenters were not blinded to experimental groups. Experimental groups received drug treatments which produce obvious behavior effects, thus by witnessing the animal undergoing the experiment, any blinding that would have been attempted would be compromised. It would be impossible to blind the experimenter to the experimental conditions while still being physically present during the experiment. Presence during the experiment is required by the ethics committee overseeing the experiment. |

## Reporting for specific materials, systems and methods

We require information from authors about some types of materials, experimental systems and methods used in many studies. Here, indicate whether each material, system or method listed is relevant to your study. If you are not sure if a list item applies to your research, read the appropriate section before selecting a response.

### Materials & experimental systems

| n/a                                 | Involvement in the study                                        |
|-------------------------------------|-----------------------------------------------------------------|
| <input checked="" type="checkbox"/> | <input type="checkbox"/> Antibodies                             |
| <input checked="" type="checkbox"/> | <input type="checkbox"/> Eukaryotic cell lines                  |
| <input checked="" type="checkbox"/> | <input type="checkbox"/> Palaeontology and archaeology          |
| <input type="checkbox"/>            | <input checked="" type="checkbox"/> Animals and other organisms |
| <input checked="" type="checkbox"/> | <input type="checkbox"/> Human research participants            |
| <input checked="" type="checkbox"/> | <input type="checkbox"/> Clinical data                          |
| <input checked="" type="checkbox"/> | <input type="checkbox"/> Dual use research of concern           |

### Methods

| n/a                                 | Involvement in the study                        |
|-------------------------------------|-------------------------------------------------|
| <input checked="" type="checkbox"/> | <input type="checkbox"/> ChIP-seq               |
| <input checked="" type="checkbox"/> | <input type="checkbox"/> Flow cytometry         |
| <input checked="" type="checkbox"/> | <input type="checkbox"/> MRI-based neuroimaging |

## Animals and other organisms

Policy information about [studies involving animals](#); [ARRIVE guidelines](#) recommended for reporting animal research

|                         |                                                                                                                                                                                                                                                                                               |
|-------------------------|-----------------------------------------------------------------------------------------------------------------------------------------------------------------------------------------------------------------------------------------------------------------------------------------------|
| Laboratory animals      | Ai94; CaMKIIa-tTA; CaMKIIa-Cre triple transgenic mice were used (Jackson Laboratory stock #024115, 8-12 weeks old). A total of 54 mice were used in this study (30 males and 24 females). Each group contains both sex and the analyses were carried out by combining the data from both sex. |
| Wild animals            | No wild animals were used in this study                                                                                                                                                                                                                                                       |
| Field-collected samples | No field collected samples were used in this study.                                                                                                                                                                                                                                           |
| Ethics oversight        | All procedures were approved by the Institutional Animal Care and Use Committee at Stanford University School of Medicine.                                                                                                                                                                    |

Note that full information on the approval of the study protocol must also be provided in the manuscript.
